# Supplementary material
Source: publisher figshare collection journal article supplement (https://diabetesjournals.figshare.com/ndownloader/files/22258002)
Supplement: Supplementary file 1 [file 22258002]

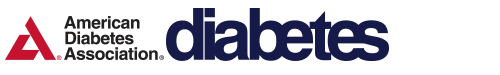
**Checklist for Reporting Human Islet Preparations Used in Research**

Adapted from Hart NJ, Powers AC (2018) Progress, challenges, and suggestions for using human islets to understand islet biology and human diabetes. Diabetologia <https://doi.org/10.1007/s00125-018-4772-2>.

|  | |
| --- | --- |
| **Manuscript DOI:** https://doi.org/10.2337/DB19-0620.R1 | |
| **Title:** Hybrid Insulin Peptides are recognized by Human T cells in the context of DRB1*04:01 | |
| **Author list:** David Arribas-Layton, Perrin Guyer, Thomas Delong, Mylinh Dang, I-Ting Chow, Cate Speake, Carla J. Greenbaum, William W. Kwok, Rocky Baker, Kathryn Haskins, and Eddie A. James | |
| **Corresponding author:** Eddie A. James | **Email address:** ejames@benaroyaresearch.org |

| **Islet preparation** | **1** | **2** | **3** | **4** | **5** | **6** | **7** | **8a** |
| --- | --- | --- | --- | --- | --- | --- | --- | --- |
| **MANDATORY INFORMATION** | | | | | | | | |
| Unique identifier | R335 |  |  |  |  |  |  |  |
| Donor age (years) | 25 |  |  |  |  |  |  |  |
| Donor sex (M/F) | M |  |  |  |  |  |  |  |
| Donor BMI (kg/m2) | 24.6 |  |  |  |  |  |  |  |
| Donor HbA1c or other measure of blood glucose control | 4.9 |  |  |  |  |  |  |  |
| Origin/source of isletsb | Alberta IsletCore |  |  |  |  |  |  |  |
| Islet isolation centre | ADI IsletCore |  |  |  |  |  |  |  |
| Donor history of diabetes? Yes/No | No |  |  |  |  |  |  |  |
| **If Yes, complete the next two lines if this information is available** | | | | | | | | |
| Diabetes duration (years) |  |  |  |  |  |  |  |  |
| Glucose-lowering therapy at time of deathc |  |  |  |  |  |  |  |  |

| **RECOMMENDED INFORMATION** | | | | | | | | |
| --- | --- | --- | --- | --- | --- | --- | --- | --- |
| Donor cause of death |  |  |  |  |  |  |  |  |
| Warm ischaemia time (h) |  |  |  |  |  |  |  |  |
| Cold ischaemia time (h) |  |  |  |  |  |  |  |  |
| Estimated purity (%) |  |  |  |  |  |  |  |  |
| Estimated viability (%) |  |  |  |  |  |  |  |  |
| Total culture time (h)d |  |  |  |  |  |  |  |  |
| Glucose-stimulated insulin secretion or other functional measuremente |  |  |  |  |  |  |  |  |
| Handpicked to purity? Yes/No |  |  |  |  |  |  |  |  |
| Additional notes |  |  |  |  |  |  |  |  |

aIf you have used more than eight islet preparations, please complete additional forms as necessary

bFor example, IIDP, ECIT, Alberta IsletCore

cPlease specify the therapy/therapies

dTime of islet culture at the isolation centre, during shipment and at the receiving laboratory

ePlease specify the test and the results
